# Supplementary material for: Assessment and Management of Mercury Leaching from a Riverbank
Source: MDPI journal article supplement (doi:10.3390/toxics11020179), 2023-02-15
Supplement: s1 [file s1]

## Supplementary Materials

# Assessment and Management of Mercury Leaching from a Riverbank

Hasti Ziaei <sup>1</sup>, Balaji Rao <sup>1</sup>, Tea V. Wood <sup>1</sup>, Uriel Garza-Rubalcava <sup>2</sup>, Ashkan Alborzi <sup>1</sup>, Huayun Zhou <sup>1</sup>, Paul Bireta <sup>3</sup>, Nancy Grosso <sup>4</sup> and Danny Reible <sup>1,2,\*</sup>

**Table S1.** Equilibrium and velocity samplers' locations and deployment periods

| Sampling Events | Equilibrium Samplers |                          | Velocity Samplers |                          |
|-----------------|----------------------|--------------------------|-------------------|--------------------------|
|                 | locations            | Deployment Period (days) | locations         | Deployment Period (days) |
| 2017            | L0, L1, L3 and L5    | 4                        | -                 | -                        |
| 2018            | L0, L1, L3 and L5    | 3                        | L0, L1, L3 and L5 | 3                        |
| 2020            | L0, L1, L3 and L5    | 2                        | L0, L1, L3 and L5 | 5                        |

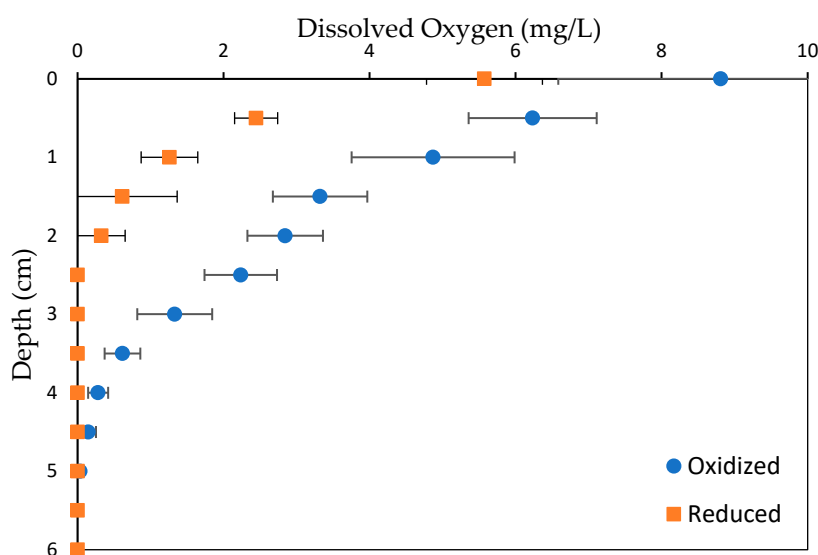

**Figure S1.** Depth profile of Oxygen concentration from the lab mesocosm using South River sediment (RRM3.5) under Oxidized and Reduced Conditions, error bars represent standard deviation from 3 replicates

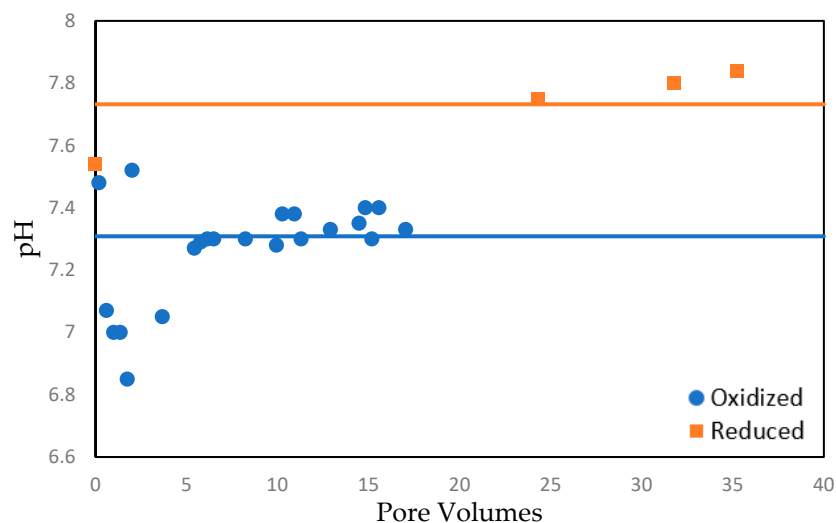

**Figure S2.** pH of the column effluent per pore volumes using South River sediment from RRM3.5 under oxidized and reduced conditions.

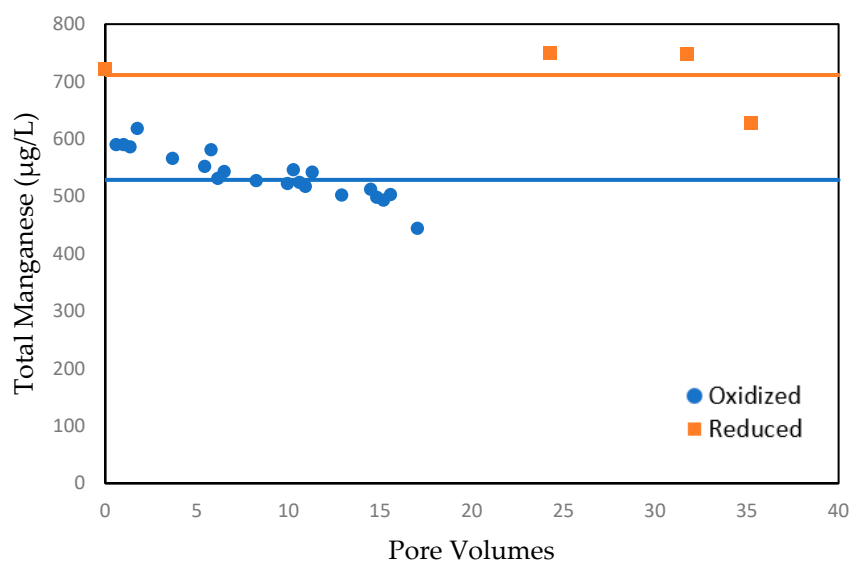

**Figure S3.** Total Manganese of the column effluent per pore volumes using South River sediment from RRM3.5 under oxidized and reduced conditions.

**Table S2.** Average THg concentration  $\pm$  one standard of deviation (n=3) in all bank locations of Constitution Park before and after the bank management.

| Sampling locations | Pre Bank Management     |                          | Post Bank Management     |                          |
|--------------------|-------------------------|--------------------------|--------------------------|--------------------------|
|                    | Baseline<br>Conc.(ng/L) | Drainage<br>Conc. (ng/L) | Baseline<br>Conc. (ng/L) | Drainage<br>Conc. (ng/L) |
| L0                 |                         |                          | 22 $\pm$ 10              | 25 $\pm$ 3               |
| L1                 | 84 $\pm$ 15             | 27 $\pm$ 7               | 12 $\pm$ 6               | 30 $\pm$ 13              |
| L3                 | 306 $\pm$ 142           | 29 $\pm$ 4               | 15 $\pm$ 5               | 73 $\pm$ 33              |
| L5                 | 2215 $\pm$ 467          | 6359 $\pm$ 1729          | 13 $\pm$ 6               | 22 $\pm$ 11              |

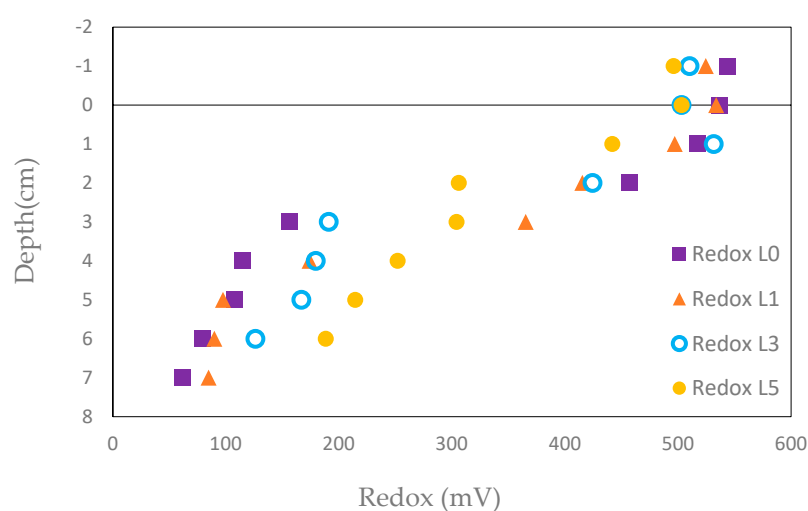**Figure S4.** Redox Potential during Drainage condition in 2018 in bank locations of Constitution Park.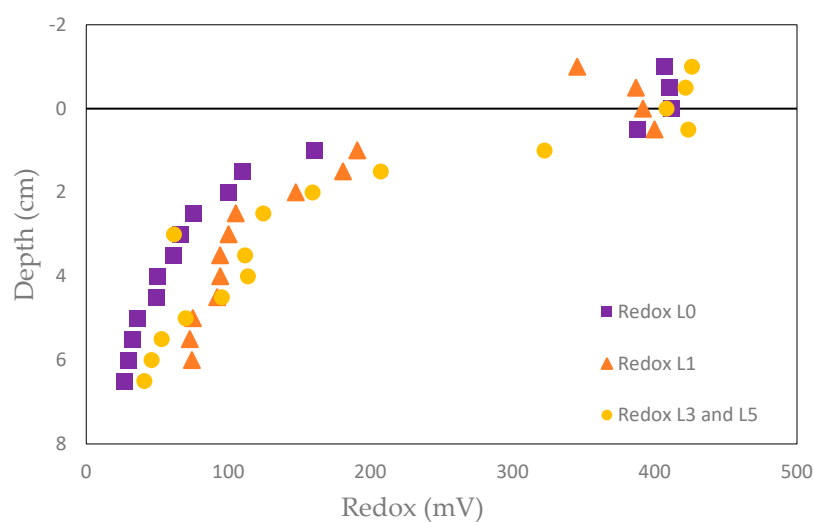**Figure S5.** Redox Potential during baseline condition in 2020 in bank locations of Constitution Park. The location 3 and location 5 were both rocky so the point that was selected was between these two locations.

**Table S3.** Bromide mass-transfer coefficients and estimates of interstitial water velocity from equilibrium diffusion samplers.

| Location – Sampling year | Depth below sediment-water interface (cm) | Measured mass-transfer coefficient, $k$ , (cm/d) | Estimate of average pore water velocity, $u$ , (cm/d) |
|--------------------------|-------------------------------------------|--------------------------------------------------|-------------------------------------------------------|
| L0, 2018<br>(Drainage)   | 20                                        | 3.05                                             | > 100                                                 |
|                          | 30                                        | 0.46                                             | 1                                                     |
|                          | 40                                        | 0.27                                             | 0                                                     |
| L0, 2020<br>(Baseline)   | 10                                        | 1.82                                             | 39                                                    |
|                          | 20                                        | 0.53                                             | 1                                                     |
|                          | 30                                        | 0.84                                             | 4                                                     |
| L1, 2018<br>(Drainage)   | 15                                        | 0.82                                             | 4                                                     |
|                          | 25                                        | 0.46                                             | 1                                                     |
| L3, 2018<br>(Drainage)   | 5                                         | 0.69                                             | 3                                                     |
|                          | 15                                        | 0.69                                             | 3                                                     |
|                          | 25                                        | 0.54                                             | 1                                                     |
| L3, 2020<br>(Baseline)   | 7                                         | 1.25                                             | 12                                                    |
|                          | 16                                        | 1.33                                             | 15                                                    |
|                          | 24                                        | 0.45                                             | 1                                                     |
| L5, 2018<br>(Drainage)   | 9                                         | 1.09                                             | 11                                                    |
|                          | 19                                        | 1.77                                             | 43                                                    |
|                          | 29                                        | 3.53                                             | > 100                                                 |
| L5, 2020<br>(Baseline)   | 14                                        | 3.89                                             | > 100                                                 |
|                          | 24                                        | 5.93                                             | > 100                                                 |
|                          | 34                                        | 1.20                                             | 11                                                    |
